# Supplementary material for: Removal of Hazardous Pollutants from Wastewaters: Applications of TiO2‐SiO2 Mixed Oxide Materials
Source: Hindawi journal article supplement (doi:10.1155/2014/617405), 2014-01-01
Supplement: f1 [file 617405.f1.docx]

**Table S1.** Comparison of various TiO2-SiO2 mixed oxide materials for removal of organics.

| **Material** | **Pollutant** | **Technique** | **Year** | **Reference** |
| --- | --- | --- | --- | --- |
| Titanium-Silicon oxides | Alkene and alkyne | Photocatalysis | 1986 | [[289](#_ENREF_289)] |
| TiO2/Silica | 1,2-dichloroethane | Catalytic combustion | 1989 | [[290](#_ENREF_290)] |
| Titania/Silica | Dichlirodifluromethane | Decomposition | 1990 | [[244](#_ENREF_244)] |
| TiO2/SiO2 | Rhodamine 6G | Photocatalysis | 1995 | [[14](#_ENREF_14)] |
| Organically modified Silica-titania | Aromatic halocarbons | Photocatalysis | 1995 | [[265](#_ENREF_265)] |
| Titania-silica | Olefin | Epoxidation | 1995 | [[273](#_ENREF_273)] |
| Titania coated on silica spheres | 2-Propanol | Dehydration | 1996 | [[291](#_ENREF_291)] |
| Titania-silica | Olefin  Saturated hydrocarbons | Epoxidation  Selective oxidation | 1996 | [[259](#_ENREF_259)] |
| TiO2 loaded Silica | Polypyzamide | Photocatalytic degradation | 1996 | [[293](#_ENREF_293)] |
| Silica-supported titania catalysts | Phenol | Photo degradation | 1997 | [[296](#_ENREF_296)] |
| TiO2/SiO2  TiO2/Al2O3 | Phenol  Salicylic acid | Photocatalytic decomposition | 1997 | [[149](#_ENREF_149)] |
| Titanium supported on MCM-41, zeolite X and zeolite Y | Acetophenone | Photocatalytic degradation | 1997 | [[147](#_ENREF_147)] |
| SiO2-TiO2 | Rhodamine 6G | Photo induced oxidation | 1998 | [[106](#_ENREF_106)] |
| Titanium-silicon oxide | 1-octanol | Liquid phase oxidation | 1998 | [[255](#_ENREF_255)] |
| TiO2-SiO2 aerogels | Phenol | Photocatalytic degradation | 1999 | [[256](#_ENREF_256)] |
| Titania-silica | Cyclohexene | Epoxidation | 2000 | [[249](#_ENREF_249)] |
| TiO2-SiO2 xerogels | Neopentane | Adsorption | 2000 | [[262](#_ENREF_262)] |
| Surface bond conjugated TiO2/SiO2 | Azo dyes | Photocatalysis | 2001 | [[301](#_ENREF_301)] |
| SBA-15 supported TiO2 | Cyanides | Oxidation | 2002 | [[233](#_ENREF_233)] |
| Titania modified mesoporous silica | Methylene blue | Photodegradation | 2002 | [[278](#_ENREF_278)] |
| Titania-silica xerogels and aerogel | Cyanide | Photo degradation | 2002 | [[287](#_ENREF_287)] |
| TiO2/SiO2 | Rhodamine B | Deethylation | 2003 | [[302](#_ENREF_302)] |
| Titania and Titania-silica aerogel | p-chlorophenol,  p-nitrophenol,  4-hydroxybenzoic acid | Photodegradation | 2003 | [[297](#_ENREF_297)] |
| TiO2-SiO2 | Propene | Epoxidation | 2003 | [[240](#_ENREF_240)] |
| Silica modified TiO2 | Paraquat, Ethylamine, trimethylamine, tetramethylammonium chloride, benzyltrimethylammonium  Chloride, phenol,  n-Dodecyltrimethylammonium chloride,  n-Octyltrimethylammonium chloride | Photocatalytic degradation | 2003 | [[295](#_ENREF_295)] |
| Silica films encapsulating TiO2 | 2,4-dichlorophenol | Photodegradation | 2004 | [[231](#_ENREF_231)] |
| TiO2 impregnated MCM-41 | Orange II | Photocatalytic degradation | 2004 | [[228](#_ENREF_228)] |
| TiO2/SiO2 | Methylene blue  NO gas | Decomposition | 2004 | [[266](#_ENREF_266)] |
| Titania-silica | Cyanide | Photo degradation | 2004 | [[288](#_ENREF_288)] |
| Alkyl grafted TiO2-MCM-41 | Nonylphenol polyethoxylate | Photocatalytic decomposition | 2004 | [[215](#_ENREF_215)] |
| Titania-modified SBA-15 | Indigo carmine | Photo decomposition | 2005 | [[226](#_ENREF_226)] |
| Titania containing MCM-41 | 4-nitrophenol | Photocatalytic decomposition | 2005 | [[219](#_ENREF_219)] |
| SiO2-TiO2 | 1,4-dichlorobenzene | Photocatalytic decomposition | 2005 | [[242](#_ENREF_242)] |
| Silica modified titanium dioxide nanoparticles | Methylene blue | Photocatalytic decomposition | 2005 | [[270](#_ENREF_270)] |
| Titania-silica composite nanoparticles | Methylene blue | Photodecomposition | 2005 | [[267](#_ENREF_267)] |
| TiO2/SBA-15 | Free cyanide  Hexacyanoferrate  Dicyanoaurate | Photo oxidation  Photodegradation  Photoreduction | 2005 | [[234](#_ENREF_234)] |
| TiO2.SiO2/beads | Organophosphorus pesticides | Photocatalytic degradation | 2005 | [[306](#_ENREF_306)] |
| Silica-loaded titania | Tetramethylammonium | photocatalytic degradation | 2005 | [[292](#_ENREF_292)] |
| Titania-silica | n-heptane | Photocatalytic decomposition | 2005 | [[286](#_ENREF_286)] |
| TiO2/SiO2 | Cyanide | Photocatalytic oxidation | 2006 | [[281](#_ENREF_281)] |
| SiO2-loaded TiO2 | Nitrobenzene, Benzyltrimethylammonium chloride, Phenol, Propinoic acid | Photocatalytic degradation | 2006 | [[294](#_ENREF_294)] |
| Titania-silica aerogel | Isopropanol and trichloroethylene | Photocatalytic oxidation | 2006 | [[275](#_ENREF_275)] |
| SiO2/TiO2 nanoparticles | 1,4-dichlorobenzene | Photodecomposition | 2006 | [[268](#_ENREF_268)] |
| Mesoporous titiania-silica | Reactive dyes | Adsorption | 2006 | [[47](#_ENREF_47)] |
| SBA-15 mesoporous silica molecular sieve modified with titanium | *p*-chlorophenol | Photocatalytic oxidation | 2006 | [[232](#_ENREF_232)] |
| Ti-SBA-15 | Methylene blue | Photocatalytic degradation | 2006 | [[221](#_ENREF_221)] |
| Titania-silica aerogel | Methanol | Photocatalytic degradation | 2007 | [[276](#_ENREF_276)] |
| SiO2@TiO2 nano-spheres | Rhodamine B | Photodegradation | 2007 | [[284](#_ENREF_284)] |
| Titania supported nanoporous MCM-41 | Methyl orange | Photocatalytic degradation | 2008 | [[225](#_ENREF_225)] |
| Titania on mesoporous silica | Rhodamine 6G  Ethanol | Degradation/Mineralization | 2008 | [[223](#_ENREF_223)] |
| Surface modified silica-titania | Methyylene blue | Adsorption and photocatalytic decomposition | 2008 | [[110](#_ENREF_110)] |
| TiO2 supported over SBA-15 | Isoproturon, Imidacloprid, Phosphamidon | Photocatalytic degradation and mineralization | 2008 | [[308](#_ENREF_308)] |
| TiO2/SiO2 | Indigo carmin | Photcatalytic degradation | 2009 | [[282](#_ENREF_282)] |
| Titania/MCM-41 | Tetramethylammonium | Photocatalytic degradation | 2009 | [[235](#_ENREF_235)] |
| TiO2/SiO2 | Rhodamine 6G | Photocatalytic degradation | 2009 | [[224](#_ENREF_224)] |
| Nanosilica supported TiO2 | Isoproturon, Imidacloprid, Phosphamidon | Photocatalytic degradation | 2009 | [[307](#_ENREF_307)] |
| TiO2 inside mesoporous silica | Methylene blue | Degradation | 2009 | [[218](#_ENREF_218)] |
| TiO2-SiO2 | Rhodamine B | Degradation | 2010 | [[280](#_ENREF_280)] |
| Titania decorated SBA-15 | Methylene blue | Photo degradation | 2011 | [[214](#_ENREF_214)] |
| Mesoporous silica modified with titania | Paraquat | Adsorption | 2011 | [[108](#_ENREF_108)] |
| Core/shell mesoporous silica nanospheres supporting nanocrystalline titania | Phenol | Photocatalytic decomposition | 2011 | [[109](#_ENREF_109)] |
| Silica-titania | Methyl orange | Photocatalytic degradation | 2011 | [[299](#_ENREF_299)] |
| Titania−silica | Phenol | Photocatalytic degradation | 2011 | [[269](#_ENREF_269)] |
| TiO2 supported on rod-like mesoporous silica SBA-15 | Methyl orange | Photocatalytic degradation | 2011 | [[220](#_ENREF_220)] |
| TiO2–SiO2 | C.I. basic violet 2 | Photocatalytic degradation | 2011 | [[300](#_ENREF_300)] |
| Ti and Co doped SBA-15 | Methylene blue | Photocatalytic degradation | 2011 | [[8](#_ENREF_8)] |
| TiO2 loaded MCM-41 and MCM-48 | Indigo carmine | Photocatalytic degradation | 2012 | [[227](#_ENREF_227)] |
| TiO2 nanoparticles loaded on MCM-48 | Methylene blue | Photocatalytic degradation | 2012 | [[222](#_ENREF_222)] |
| TiO2/MCM-41 | Rhodamine B and Phenol | Degradation and Adsorption | 2012 | [[217](#_ENREF_217)] |
| TiO2/SBA-15 | Azo dyes | Decolorization | 2012 | [[229](#_ENREF_229)] |
| nanostructured TiO2/SiO2 | Acid Orange | Photocatalytic degradation | 2013 | [[283](#_ENREF_283)] |
| TiO2 coated glass microspheres | Dimethyl phthalate | Degradation | 2013 | [[309](#_ENREF_309)] |
| Titania supported silica materials | Rhodamine B | Adsorption and degradation | 2013 | [[303](#_ENREF_303)] |
| TiO2-SiO2 | Rhodamine B | Degradation | 2013 | [[304](#_ENREF_304)] |
| TiO2-SiO2 | Rhodamine B | Adsorption | 2013 | [[305](#_ENREF_305)] |
| TiO2-SiO2 | Phenol | Degradation | 2014 | [[298](#_ENREF_298)] |
